# Supplementary material for: An extended dsRBD with a novel zinc-binding motif mediates nuclear retention of fission yeast Dicer
Source: PubMed Central journal article supplement — EMBO J. 2011 Aug 16;30(20):4223–35. doi: 10.1038/emboj.2011.300 (PMC3199388; doi:10.1038/emboj.2011.300), 2011-08-16
Supplement: emboj2011300s1.pdf [file emboj2011300s1.pdf]

## **Supplementary Data**

### **An Extended dsRBD with a Novel Zinc-Binding Motif Mediates Nuclear Retention of Fission Yeast Dicer**

Pierre Barraud, Stephan Emmerth, Yukiko Shimada, Hans-Rudolf Hotz, Frédéric H.-T. Allain, and Marc Bühler

## Supplementary Figures

---

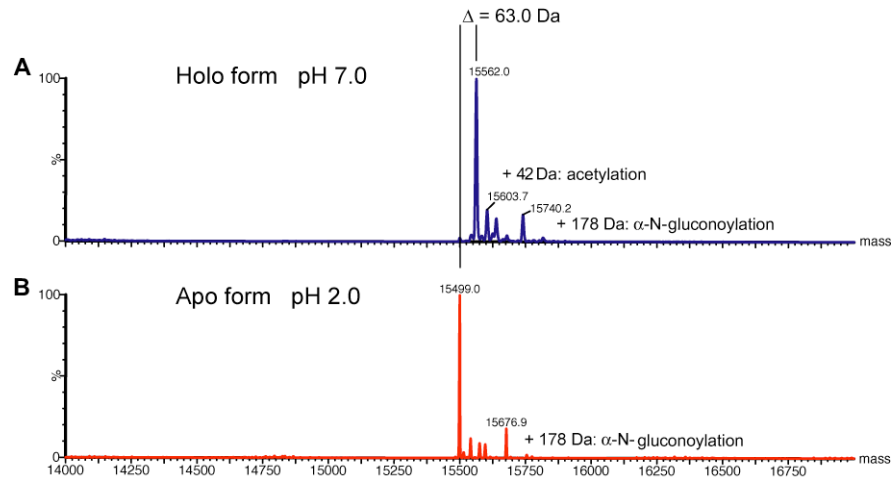

### Supplementary Figure 1.

#### The C-terminal domain of Dcr1 binds one zinc ion per protein domain.

(A) ESI-TOF deconvoluted spectrum obtained under non-denaturing conditions (10 mM ammonium acetate pH 7.0). (B) ESI-TOF deconvoluted spectrum obtained under denaturing conditions (50 % acetonitrile and 0.1 % formic acid pH 2.0). Minor peaks come from acetylation,  $\alpha$ -N-gluconoylation of the histidine tag and phosphorylation.

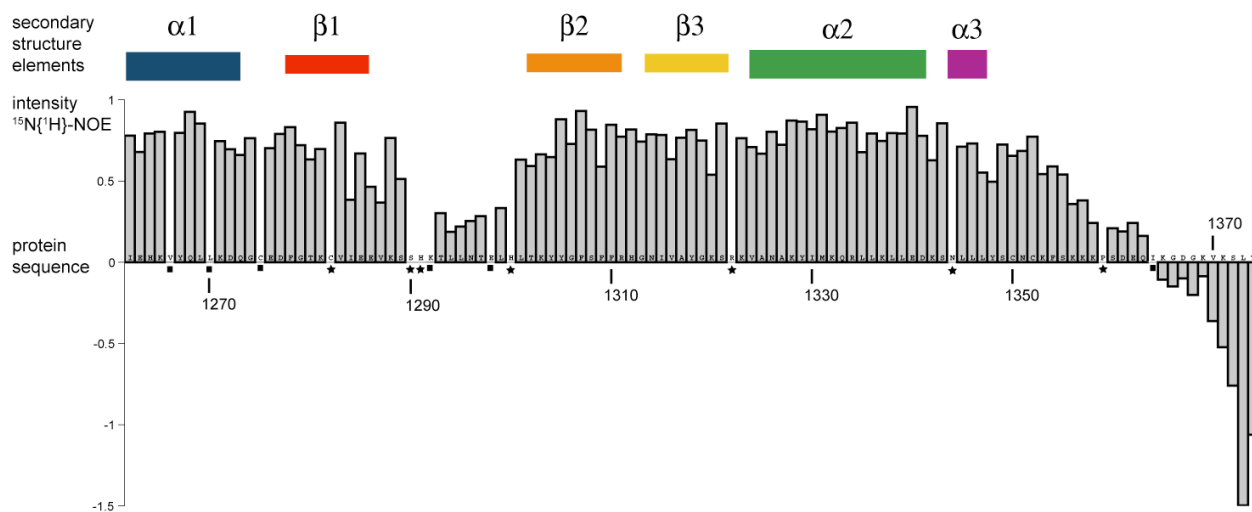

### Supplementary Figure 2.

#### Residues of C33 following the canonical dsRBD fold are structured.

$^{15}\text{N}\{^1\text{H}\}$ -NOE values plotted against the Dcr1 dsRBD sequence showing that the residues following the canonical dsRBD fold are structured. Values for residues marked with black squares could not be determined due to resonance overlap. Residues marked with an asterisk correspond to the one for which the amide assignment is missing. The secondary structure elements are represented as rectangles above the diagram. The color code refers to the one used in Figure 1.

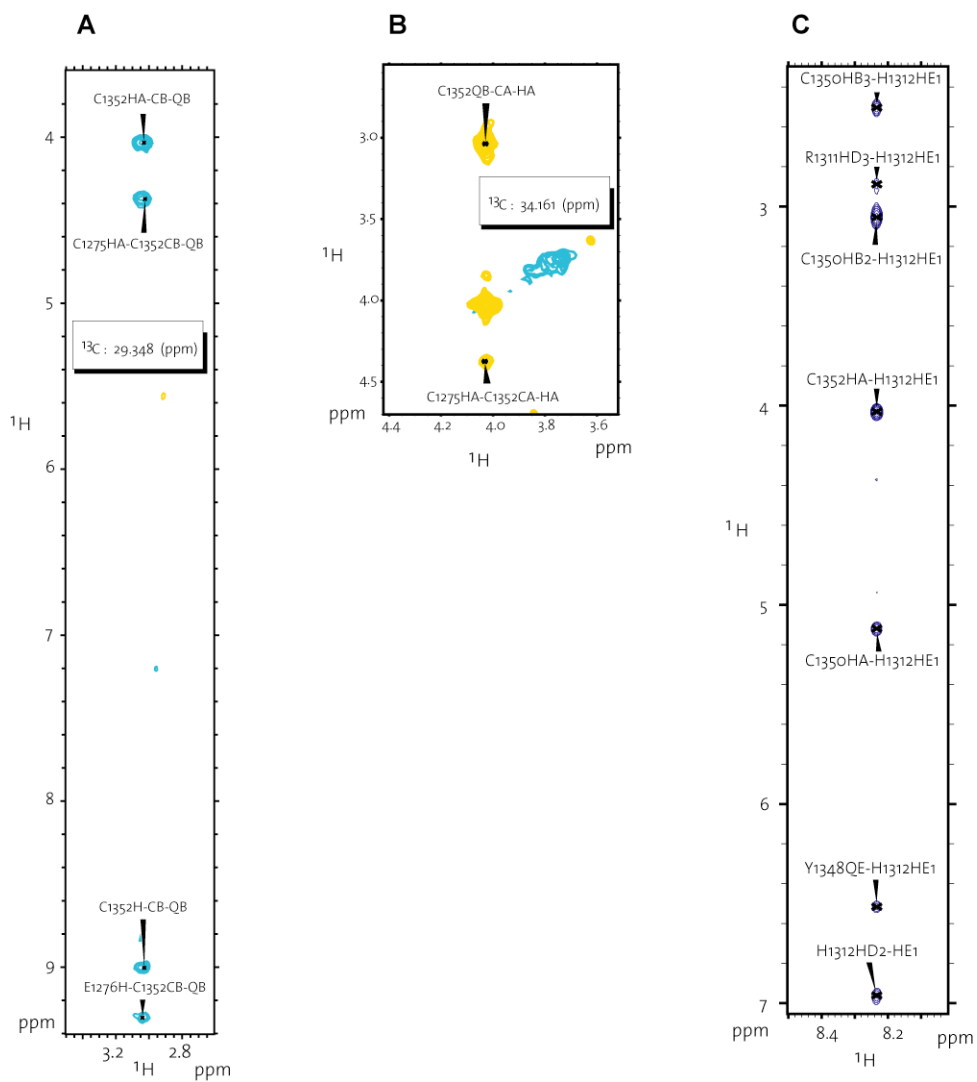

### Supplementary Figure 3.

**Coordination sphere around the zinc.** (A-C) NOE contacts supporting the coordination sphere around the zinc ion. (A) Slice of the aliphatic 3D NOESY-( $^1\text{H}$ - $^{13}\text{C}$ )-HSQC showing contacts between C1352 and C1275. (B) Slice of the aliphatic 3D NOESY-( $^1\text{H}$ - $^{13}\text{C}$ )-HSQC showing contacts between C1352 and C1275. (C) Region of the 2D ( $^1\text{H}$ - $^1\text{H}$ )-NOESY showing contacts between H1312 H $\epsilon$ 1 and C1350 and C1352.

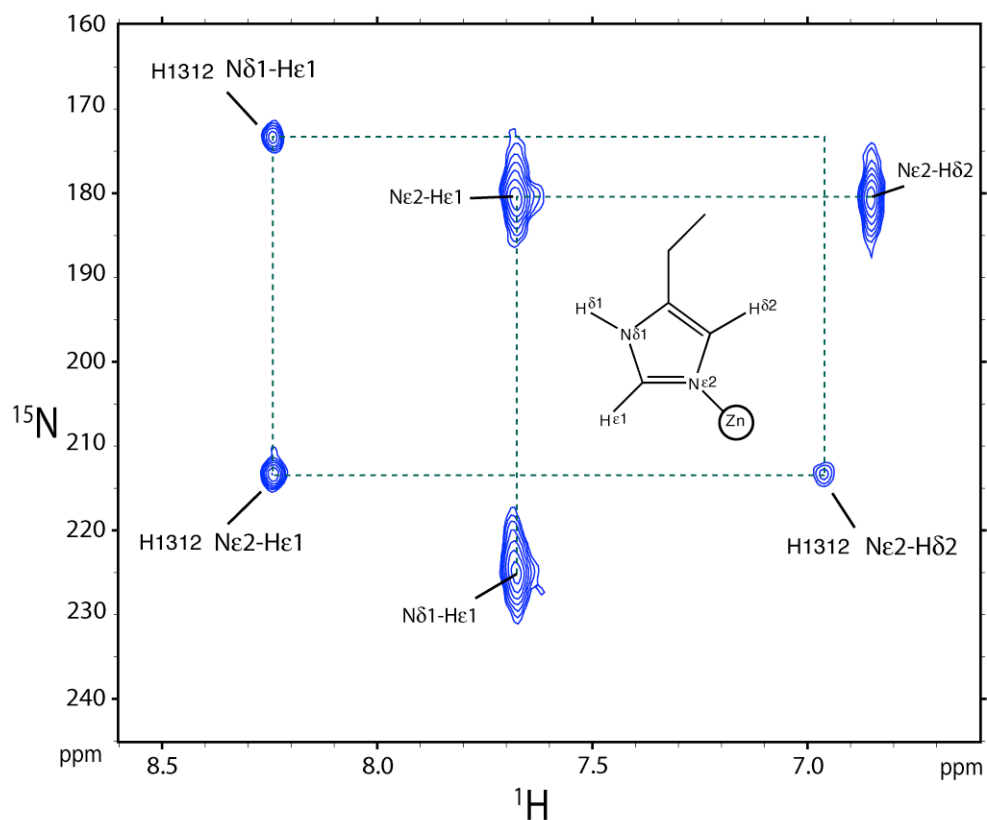

**Supplementary Figure 4.**

**Long-range  $^1\text{H}$ - $^{15}\text{N}$  HSQC spectrum for the determination of the coordination mode of histidine 1312.**

The pattern of cross peaks for H1312 is uniquely compatible with protonation on N $\delta$ 1 and therefore coordination through the N $\epsilon$ 2 atom (c.f. Legge et al. (2004) *J. Mol. Biol.* 343, 1081-1093). The other peaks correspond to histidines from the N-terminal 6-histidine tag and to histidines present in the unstructured loop 2 (See Figure 1B). The pattern is characteristic of the histidine tautomer protonated on the N $\epsilon$ 2.

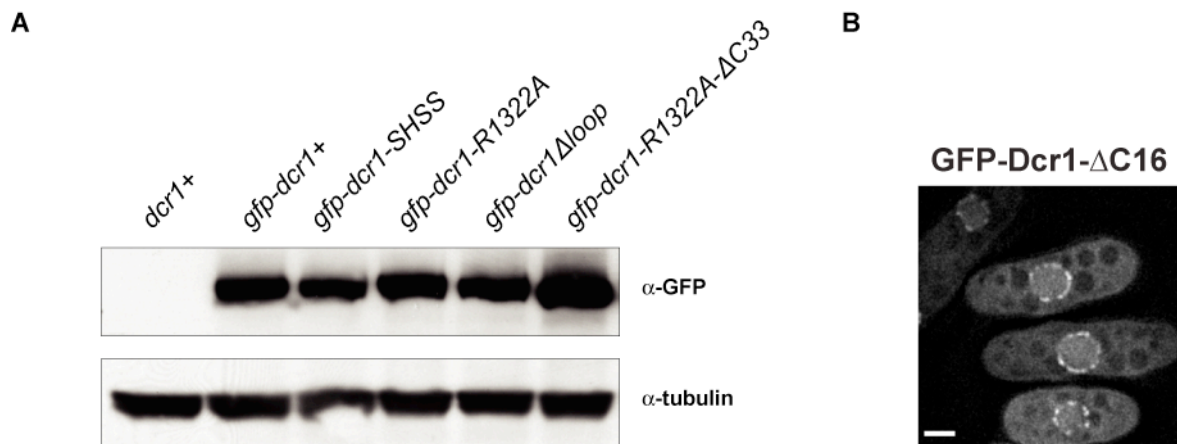

**Supplementary Figure 5.**

**Western blot analysis and imaging of GFP-Dcr1- $\Delta$ C16.** (A) Western blot showing that stability is not affected for the zinc coordination motif mutant or the RNA-binding mutants. (B) Live-cell imaging of GFP-Dcr1- $\Delta$ C16. Scale bars = 2  $\mu$ m.

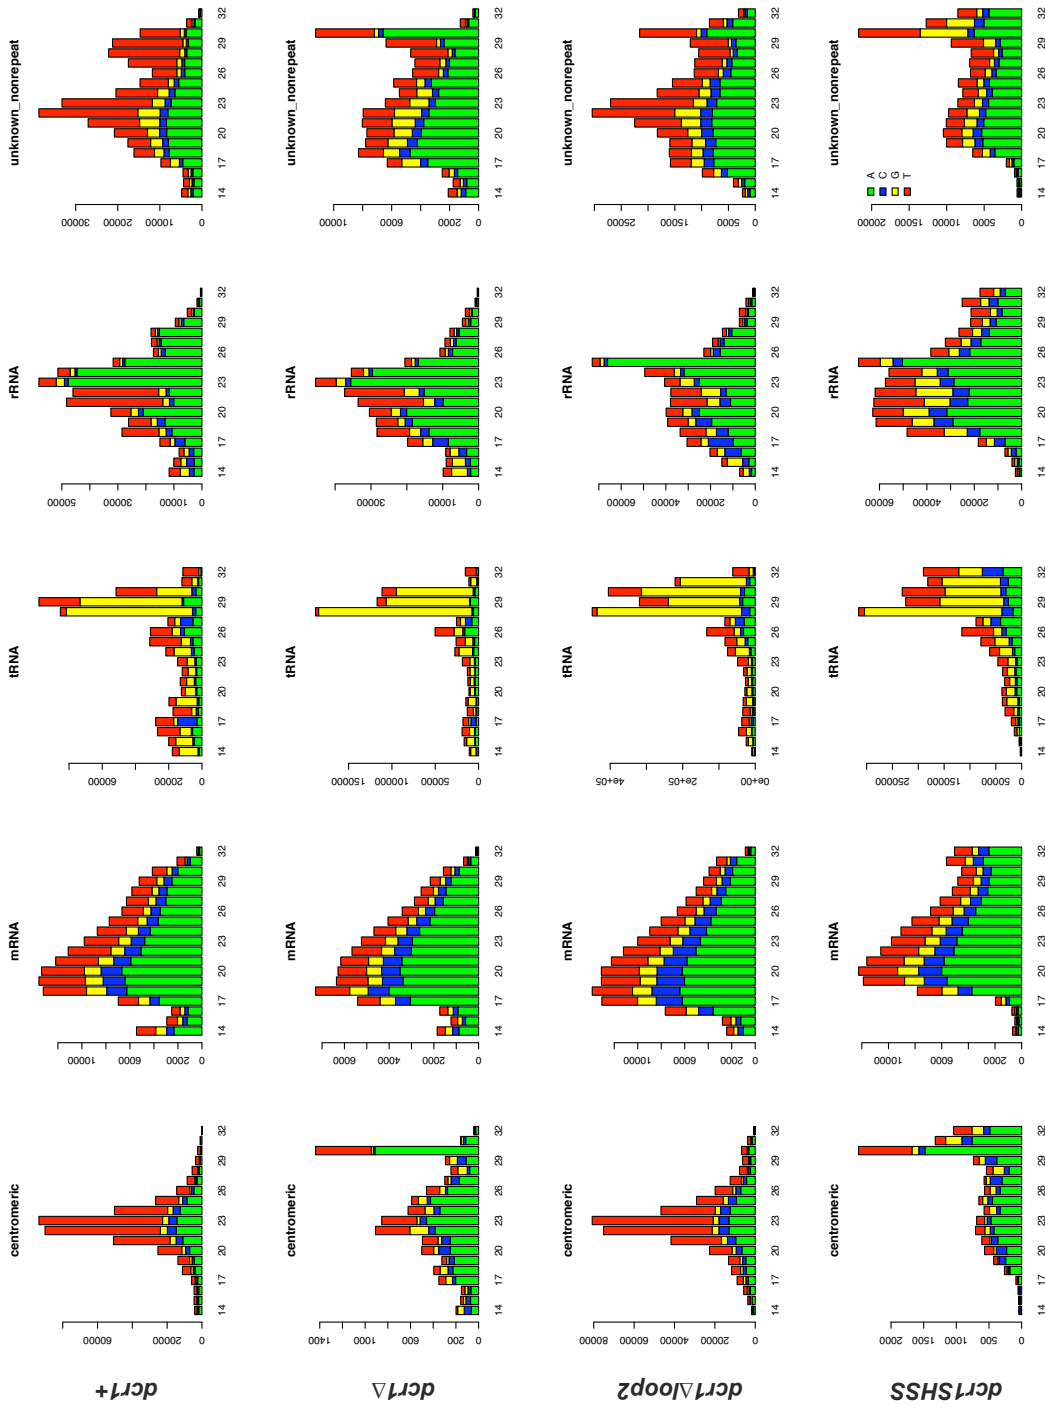

**Supplementary Figure 6.** Size distribution and the 5'-most nucleotide of major classes of sRNAs sequenced from *dcr1+*, *dcr1Δ*, *dcr1Δloop2*, and *dcr1-SHSS* cells.

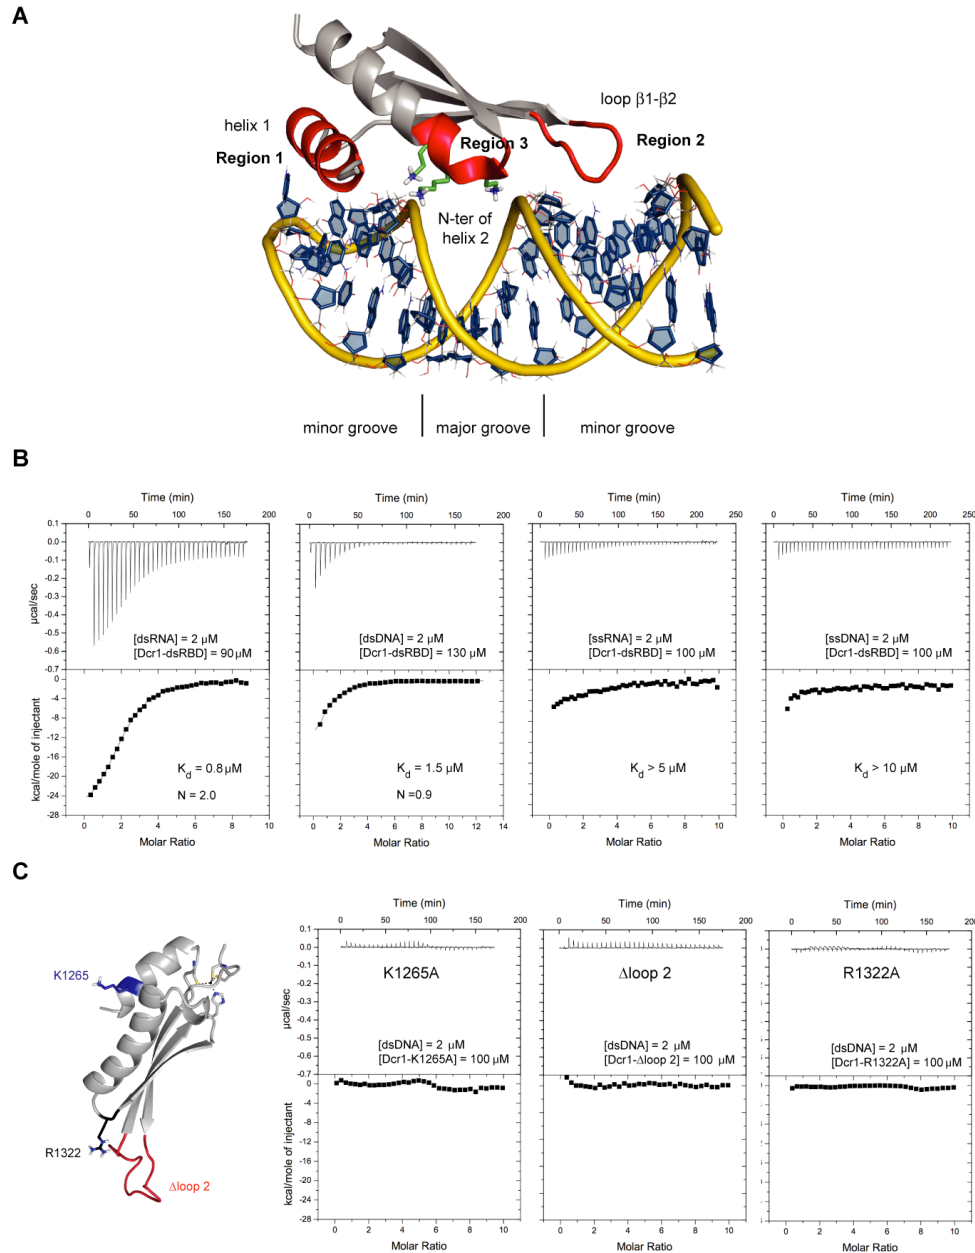

### Supplementary Figure 7.

**The Dcr1 dsRBD binds preferentially to dsRNA.** (A) Regions of interaction between a classical dsRBD and a dsRNA target shown on the structure of ADAR2 dsRBD1 in complex with RNA (PDB code 2L3C). The three regions of interactions are represented in red on the protein structure (helix 1 and loop  $\beta$ 1- $\beta$ 2 interact with the minor groove at one turn of interval and the N-terminal part of helix 2 interacts across the major groove). (B) ITC measurements of *S. pombe* Dcr1 dsRBD with different nucleic acid targets. From left to right: dsRNA (24 bp), dsDNA (24 bp), ssRNA (24 nt) and ssDNA (24 nt). (C) ITC measurements with dsDNA and Dcr1 dsRBD mutants (R1322A,  $\Delta$ loop 2 and K1265A).



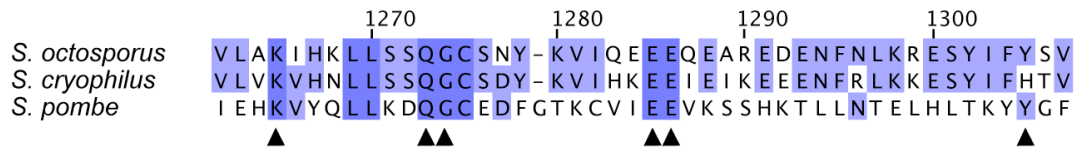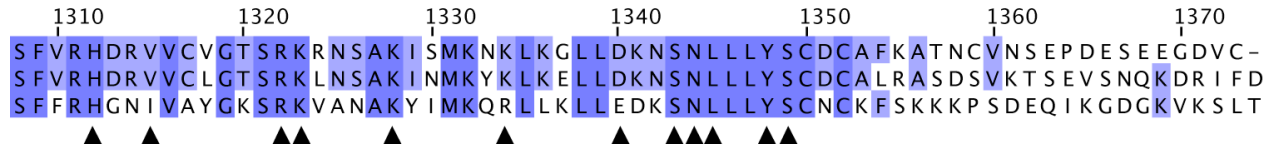

### Supplementary Figure 8.

#### Identification of the solvent exposed and conserved residues of Dcr1 dsRBD.

Black arrows show residues with a solvent exposed side chain and conserved biochemical properties among *S. pombe*, *S. octosporus* and *S. cryophilus*. Those residues are displayed in color on Figure 5A. Residue numbers refer to the *S. pombe* Dcr1 protein (UniprotKB Q09884).

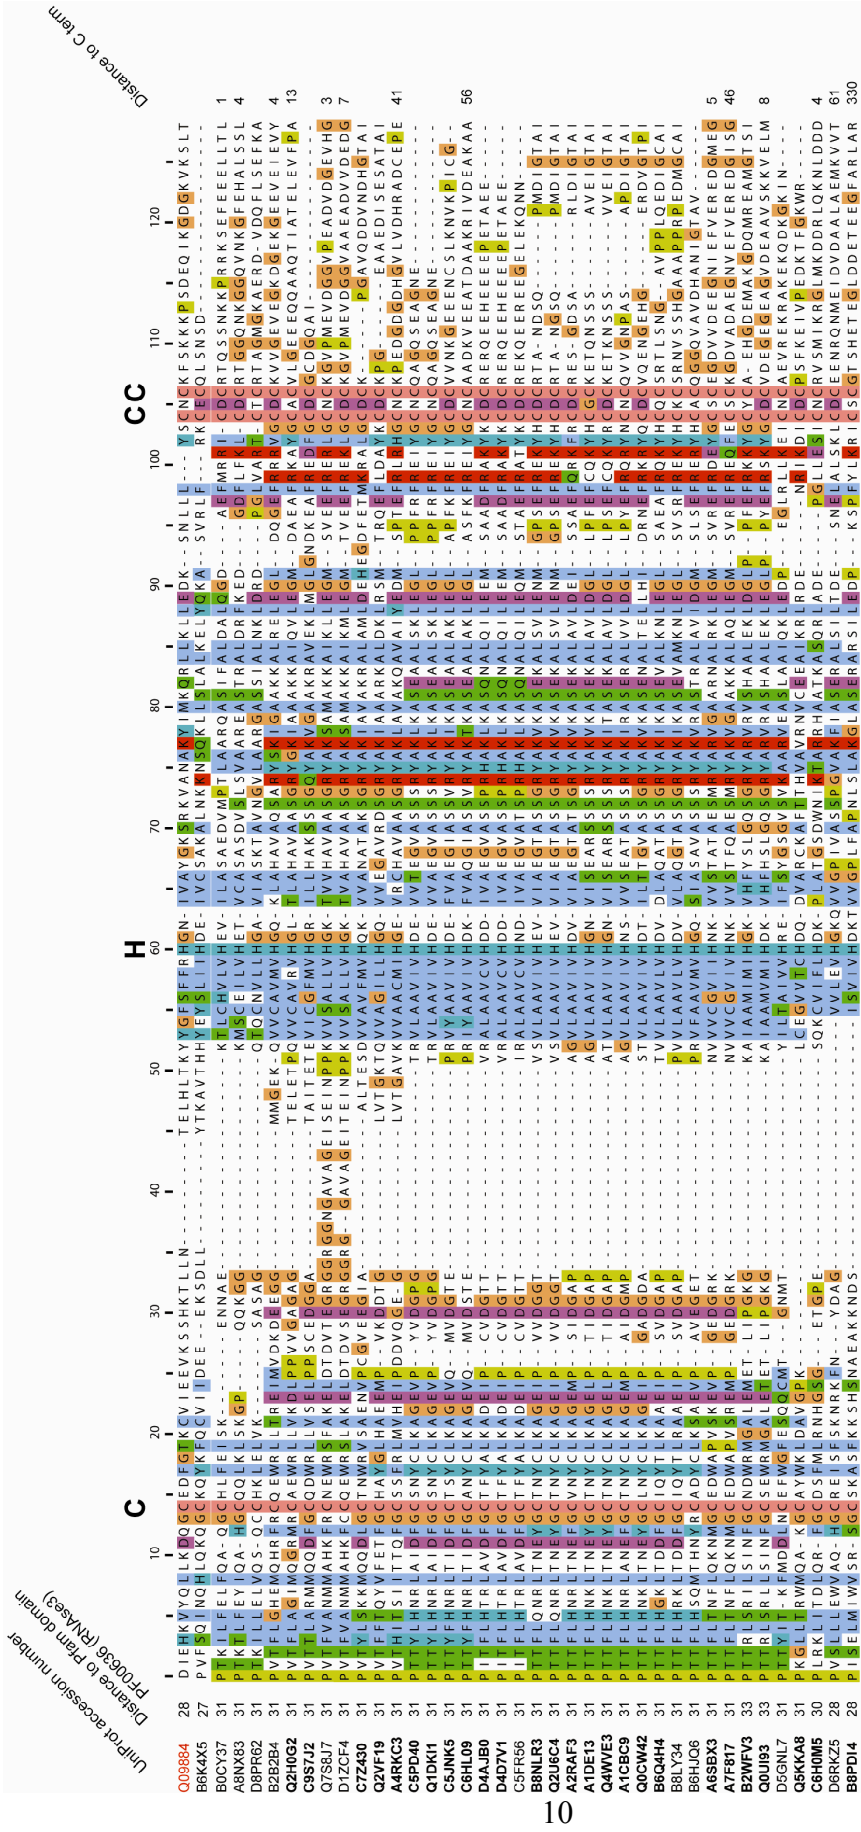

## Supplementary Table I

Small RNAs sequenced from wild-type and Dcr1 mutant cells

|                     | <i>dcr1+</i>   |            | <i>dcr1Δ</i>   |            | <i>dcr1-SHSS</i> |            | <i>dcr1Δloop2</i> |            |
|---------------------|----------------|------------|----------------|------------|------------------|------------|-------------------|------------|
|                     | reads          | %          | reads          | %          | reads            | %          | reads             | %          |
| rRNA+               | 437259         | 23         | 345175         | 27         | 693100           | 25         | 499969            | 14         |
| rRNA-               | 1122           | 0.1        | 158            | 0          | 739              | 0          | 451               | 0          |
| tRNA+               | 544340         | 29         | 719518         | 56         | 1752112          | 63         | 2155557           | 61         |
| tRNA-               | 460            | 0          | 244            | 0          | 365              | 0          | 226               | 0          |
| snRNA+              | 5728           | 0.3        | 7382           | 0.6        | 9529             | 0.3        | 5786              | 0.2        |
| snRNA-              | 26             | 0          | 4              | 0          | 12               | 0          | 22                | 0          |
| snoRNA+             | 2074           | 0.1        | 1165           | 0.1        | 2938             | 0.1        | 2136              | 0.1        |
| snoRNA-             | 201            | 0          | 112            | 0          | 338              | 0          | 326               | 0          |
| 3UTR+               | 14172          | 0.7        | 6866           | 0.5        | 10732            | 0.4        | 11557             | 0.3        |
| 3UTR-               | 1312           | 0.1        | 533            | 0          | 439              | 0          | 1042              | 0          |
| 5UTR+               | 2835           | 0.1        | 1301           | 0.1        | 2269             | 0.1        | 2627              | 0.1        |
| 5UTR-               | 163            | 0          | 56             | 0          | 138              | 0          | 194               | 0          |
| mRNA+               | 126176         | 6.6        | 64120          | 5          | 117254           | 4.2        | 135565            | 3.8        |
| mRNA-               | 12114          | 0.6        | 5243           | 0.4        | 6013             | 0.2        | 10885             | 0.3        |
| intron+             | 10031          | 0.5        | 7536           | 0.6        | 10126            | 0.4        | 15736             | 0.4        |
| intron-             | 465            | 0          | 324            | 0          | 1006             | 0          | 432               | 0          |
| centromeric+        | 401625         | 21         | 7123           | 0.6        | 9712             | 0.3        | 382979            | 11         |
| centromeric-        | 15473          | 0.8        | 1357           | 0.1        | 2286             | 0.1        | 15895             | 0.4        |
| telomeric+          | 1              | 0          | 0              | 0          | 0                | 0          | 2                 | 0          |
| telomeric-          | 3              | 0          | 1              | 0          | 1                | 0          | 0                 | 0          |
| mating_type_region+ | 798            | 0          | 8              | 0          | 2                | 0          | 756               | 0          |
| mating_type_region- | 1315           | 0.1        | 17             | 0          | 7                | 0          | 1292              | 0          |
| rep_origin+         | 56             | 0          | 21             | 0          | 20               | 0          | 59                | 0          |
| rep_origin-         | 5              | 0          | 1              | 0          | 2                | 0          | 12                | 0          |
| pseudogene+         | 316            | 0          | 35             | 0          | 89               | 0          | 315               | 0          |
| pseudogene-         | 261            | 0          | 14             | 0          | 21               | 0          | 204               | 0          |
| LTR+                | 138            | 0          | 75             | 0          | 81               | 0          | 104               | 0          |
| LTR-                | 55             | 0          | 45             | 0          | 30               | 0          | 72                | 0          |
| wtf+                | 450            | 0          | 298            | 0          | 435              | 0          | 539               | 0          |
| wtf-                | 6              | 0          | 4              | 0          | 5                | 0          | 5                 | 0          |
| misc_RNA+           | 18258          | 1          | 11769          | 0.9        | 19463            | 0.7        | 23950             | 0.7        |
| misc_RNA-           | 5558           | 0.3        | 861            | 0.1        | 1255             | 0          | 3151              | 0.1        |
| unknown_non-repeat  | 303920         | 16         | 103173         | 8          | 148691           | 5.3        | 274583            | 7.7        |
| <b>sum</b>          | <b>1906716</b> | <b>100</b> | <b>1284539</b> | <b>100</b> | <b>2789210</b>   | <b>100</b> | <b>3546429</b>    | <b>100</b> |

Weighted number of small RNA reads for different genomic features from deep sequencing of total sRNAs in wild-type, *dcr1Δ*, *dcr1-SHSS*, and *dcr1Δloop2* mutant cells.

## Supplementary Table II

Pathogenic yeasts expressing at least one dicer protein containing the CHCC motif

| Accession | Organism                        | Pathology                                                                                                         |
|-----------|---------------------------------|-------------------------------------------------------------------------------------------------------------------|
| Q5KKA8    | <b>Cryptococcus neoformans</b>  | Cryptococcosis (opportunistic infection in HIV+ patients, fungal meningitis)                                      |
| Q2H0G2    | Chaetomium globosum             | Peritonitis, Onychomycosis                                                                                        |
| C5PD40    | Coccidioides posadasii          | Coccidioidomycosis (California Disease, Valley Fever)                                                             |
| Q1DKI1    | Coccidioides immitis            | Coccidioidomycosis (California Disease, Valley Fever)                                                             |
| C5JNK5    | <b>Ajellomyces dermatitidis</b> | Blastomycosis (Chicago disease, Gilchrist's disease)                                                              |
| C6HL09    | Ajellomyces capsulata           | Darling's Disease                                                                                                 |
| D4AJB0    | Arthroderma benhamiae           | Dermatophytosis (Ringworm)                                                                                        |
| B8NLR3    | Aspergillus flavus              | Aspergillosis (lung, occasionally identified as the cause of corneal, otomycotic and naso-orbital infections )    |
| Q2U6C4    | Aspergillus oryzae              | Aspergillosis (only occasionally pathogenic though)                                                               |
| A2RAF3    | Aspergillus niger               | Aspergillosis                                                                                                     |
| Q4WVE3    | <b>Aspergillus fumigatus</b>    | Major cause of Aspergillosis (both invasive and allergic Aspergilloses), Mycotoxicosis, Farmer's Lung             |
| A1DE13    | Neosartorya fischeri            | Aspergillosis                                                                                                     |
| A1CBC9    | Aspergillus clavatus            | Aspergillosis, Mycotoxicosis                                                                                      |
| Q0CW42    | <b>Aspergillus terreus</b>      | Aspergillosis of the lungs and or disseminated aspergillosis, Onychomycosis, Mycotoxicosis (thermotolerant yeast) |
| B6Q4H4    | Penicillium marneffeii          | Penicilliosis (third most common opportunistic infection in HIV+ patients)                                        |
| D4D7V1    | Trichophyton verrucosum         | Dermatophytosis (Ringworm)                                                                                        |
| C7Z430    | Nectria haematococca            | Plant diseases, opportunistic infections in animals                                                               |
| C9S7J2    | Verticillium albo-atrum         | Verticillium Wilt Disease                                                                                         |
| Q2VF19    | Cryphonectria parasitica        | Chestnut Blight                                                                                                   |
| A4RKC3    | <b>Magnaporthe grisea</b>       | Blast Disease (rice)                                                                                              |
| A6SBX3    | Botryotinia fuckeliana          | Gray mold disease                                                                                                 |
| A7F817    | Sclerotinia sclerotiorum        | White Mold                                                                                                        |
| B2WV3     | Pyrenophora tritici-repentis    | Tan spot                                                                                                          |
| Q0UI93    | Phaeosphaeria nodorum           | Glume blotch (major pathogen of wheat)                                                                            |
| C6H0M5    | Mucor c. f. lusitanicus         | plant diseases                                                                                                    |
| B8PDI4    | Postia placenta                 | destructive decay of wood in buildings and other structures                                                       |

UniProt release 2010\_10 - Oct 5, 2010. Gold, human or animal pathogens. Yellow, plant pathogens.

**Strains used in this study**

| Strain  | Genotype                                                                                                   | Source |
|---------|------------------------------------------------------------------------------------------------------------|--------|
| SPB80   | <i>h+ leu1-32 ura4-D18 ori1 ade6-216 imr1R(Nco1)::ura4+</i>                                                | 2      |
| SPB81   | <i>h+ leu1-32 ura4-D18 ori1 ade6-216 imr1R(Nco1)::ura4+ dcr1Δ::TAP-Kan</i>                                 | 2      |
| SPB287  | <i>h+ leu1-32 ura4-D18 ori1 ade6-216 imr1R(Nco1)::ura4+ dcr1-ΔC33::Nat</i>                                 | 1      |
| SPB278  | <i>h+ leu1-32 ura4-D18 ade6-216 imr1R(Nco1)::ura4+ Kan-nmt1P3-GFP::dcr1+</i>                               | 1      |
| SBP777  | <i>h+ leu1-32 ura4-D18 ade6-216 imr1R(Nco1)::ura4+ Kan-nmt1P3-GFP::dcr1-SHSS::Nat</i>                      | 1      |
| SPB776  | <i>h+ leu1-32 ura4-D18 ori1 ade6-216 imr1R(Nco1)::ura4+ dcr1-SHSS::Nat</i>                                 | 1      |
| SPB773  | <i>h+ leu1-32 ura4-D18 ori1 ade6-216 imr1R(Nco1)::ura4+ Kan-nmt1P3-GFP::dcr1-ΔC16::Nat</i>                 | 1      |
| SBP771  | <i>h+ leu1-32 ura4-D18 ade6-216 imr1R(Nco1)::ura4+ Kan-nmt1P3-GFP::dcr1-Δloop2::Nat</i>                    | 1      |
| SPB770  | <i>h+ leu1-32 ura4-D18 ori1 ade6-216 imr1R(Nco1)::ura4+ dcr1-Δloop2::Nat</i>                               | 1      |
| SBP773  | <i>h+ leu1-32 ura4-D18 ade6-216 imr1R(Nco1)::ura4+ Kan-nmt1P3-GFP::dcr1-ΔC16::Nat</i>                      | 1      |
| SPB772  | <i>h+ leu1-32 ura4-D18 ori1 ade6-216 imr1R(Nco1)::ura4+ dcr1-ΔC16::Nat</i>                                 | 1      |
| SPB919  | <i>h+ leu1-32 ura4-D18 ade6-216 imr1R(Nco1)::ura4+ Kan-nmt1P3-GFP::dcr1-R1322A::Hph</i>                    | 1      |
| SPB918  | <i>h+ leu1-32 ura4-D18 ori1 ade6-216 imr1R(Nco1)::ura4+ dcr-R1322A::Hph</i>                                | 1      |
| SPB919  | <i>h+ leu1-32 ura4-D18 ade6-216 imr1R(Nco1)::ura4+ Kan-nmt1P3-GFP::dcr1-R1322A-ΔC33::Hph</i>               | 1      |
| SPB949  | <i>h+ leu1-32 ura4-D18 ori1 ade6-216 imr1R(Nco1)::ura4+ dcr-K1265A::Hph</i>                                | 1      |
| SPB775  | <i>h+ leu1-32 ura4-D18 ori1 ade6-216 imr1R(Nco1)::ura4+ Kan-nmt1P3-GFP::dcr1-Y1348A::Nat</i>               | 1      |
| SPB1079 | <i>h+ leu1-32 ura4-D18 ori1 ade6-216 imr1R(Nco1)::ura4+ Kan-nmt1P3-GFP::dcr1-R1334A::Nat</i>               | 1      |
| SPB1080 | <i>h+ leu1-32 ura4-D18 ori1 ade6-216 imr1R(Nco1)::ura4+ Kan-nmt1P3-GFP::dcr1-S1349A::Nat</i>               | 1      |
| SPB1082 | <i>h+ leu1-32 ura4-D18 ori1 ade6-216 imr1R(Nco1)::ura4+ Kan-nmt1P3-GFP::dcr1-N1344A::Nat</i>               | 1      |
| SPB1116 | <i>h+ leu1-32 ura4-D18 ori1 ade6-216 imr1R(Nco1)::ura4+ Kan-nmt1P3-GFP::dcr1-Y1348A-N1344A-S1349A::Nat</i> | 1      |

1 = Bühler lab strain collection, 2 = obtained from Danesh Moazed
